# Supplementary material for: Exendin-4, a glucagon-like peptide-1 analogue accelerates healing of chronic gastric ulcer in diabetic rats
Source: PubMed Central journal article supplement (PMC5667749; doi:10.1371/journal.pone.0187434), 2017-11-02
Supplement: pone.0187434.s001.pdf [file pone.0187434.s001.pdf]

## Ulcer base (cm<sup>2</sup>)

| PUD   | PUDE  | PUDD  | PUDDE |
|-------|-------|-------|-------|
| 0.257 | 0.043 | 0.367 | 0.086 |
| 0.079 | 0.156 | 0.357 | 0.338 |
| 0.054 | 0.11  | 0.343 | 0.215 |
| 0.071 | 0.371 | 0.604 | 0.16  |
| 0.064 | 0.211 | 0.56  | 0.1   |
| 0.097 | 0.326 | 0.968 | 0.179 |
|       | 0.192 | 0.279 |       |
|       |       | 0.374 |       |

PUD: control; PUDE: control+Ex4; PUDD: DM; PUDDE: DM+Ex4

## Ulcer border (cm<sup>2</sup>)

| PUD   | PUDE  | PUDD  | PUDDE |
|-------|-------|-------|-------|
| 0.914 | 0.412 | 1.05  | 0.364 |
| 0.324 | 0.768 | 1.003 | 0.995 |
| 0.215 | 0.285 | 1.209 | 1.259 |
| 0.359 | 1.254 | 1.162 | 0.674 |
| 0.551 | 0.527 | 1.35  | 0.446 |
| 0.31  | 0.866 | 1.744 | 0.673 |
|       | 0.496 | 0.685 |       |
|       |       | 1.332 |       |

PUD: control; PUDE: control+Ex4; PUDD: DM; PUDDE: DM+Ex4
