# Supplementary material for: Exendin-4, a glucagon-like peptide-1 analogue accelerates healing of chronic gastric ulcer in diabetic rats
Source: PubMed Central journal article supplement (PMC5667749; doi:10.1371/journal.pone.0187434), 2017-11-02
Supplement: pone.0187434.s002.pdf [file pone.0187434.s002.pdf]

## Tissue Il-1B (pg/ml)

| PUD    | PUDD   | PUDDE  |
|--------|--------|--------|
| 103.53 | 333.48 | 55.24  |
| 115.37 | 194.04 | 73.2   |
| 97.02  | 333.48 | 125.82 |
| 120.48 | 185.81 | 79.83  |
| 149.63 | 181.83 | 117.9  |
| 166.74 | 117.9  | 225.81 |
| 117.9  |        | 246.25 |
| 120.48 |        |        |

PUD: control; PUDD: DM; PUDDE: DM+Ex4

### Tissue IL-6 (pg/ml)

| PUD    | PUDD   | PUDDE  |
|--------|--------|--------|
| 6.7198 | 6.5465 | 5.94   |
| 6.6331 | 6.8064 | 6.1566 |
| 6.3299 | 7.1099 | 5.7234 |
| 6.2433 | 6.9363 | 7.0553 |
| 6.5032 | 7.6728 | 6.5465 |
| 6.1566 | 6.3299 | 5.94   |
| 6.7198 |        | 6.3299 |
|        |        | 7.0449 |
|        |        | 4.9003 |

PUD: control; PUDD: DM; PUDDE: DM+Ex4

## Tissue IL-10 (pg/ml)

| PUD    | PUDD   | PUDDE  |
|--------|--------|--------|
| 683.56 | 203.51 | 451.67 |
| 732.61 | 371.25 | 397.24 |
| 563.55 | 172.48 | 555.74 |
| 332.72 | 93.56  | 332.47 |
| 711.43 | 283.31 | 310.93 |
| 392.27 | 273.75 | 614.82 |
| 1140   | 310.66 | 703.59 |
| 579.32 |        | 359.34 |
| 210.83 |        | 263.49 |

PUD: control; PUDD: DM; PUDDE: DM+Ex4

## Tissue MCP-1 (pg/ml)

| PUD    | PUDD   | PUDDE  |
|--------|--------|--------|
| 119.76 | 119.76 | 97.62  |
| 303.95 | 119.76 | 206.3  |
| 119.76 | 151.98 | 95.1   |
| 119.76 | 303.95 | 106.3  |
|        |        | 119.76 |
|        |        | 119.76 |
|        |        | 119.76 |

PUD: control; PUDD: DM; PUDDE: DM+Ex4
