# Supplementary material for: Exendin-4, a glucagon-like peptide-1 analogue accelerates healing of chronic gastric ulcer in diabetic rats
Source: PubMed Central journal article supplement (PMC5667749; doi:10.1371/journal.pone.0187434), 2017-11-02
Supplement: pone.0187434.s003.pdf [file pone.0187434.s003.pdf]

## Western blot densitometry (ImageJ)

|      | peNOS | eNOS | HO-1  | CD11b | IL10 | Caspase3 | MMP2 |
|------|-------|------|-------|-------|------|----------|------|
| Sham | 1.21  | 2.14 | 2.89  | 1.08  | 1.91 |          | 0.83 |
| Sham | 1.00  | 1.00 | 1.00  | 1.00  | 1.00 | 1.00     | 1.00 |
| Sham | 1.00  | 1.00 | 1.00  | 1.00  | 1.00 | 1.00     | 1.00 |
| PUD  |       |      |       | 3.74  | 2.74 | 1.47     | 1.39 |
| PUD  | 6.46  | 5.82 | 4.10  | 7.90  | 2.34 | 0.85     | 1.84 |
| PUD  | 5.13  | 5.52 | 13.11 | 4.52  | 2.90 | 1.53     | 1.22 |
| PUD  |       |      | 6.47  | 4.19  | 2.13 | 0.96     | 1.58 |
| PUD  | 2.65  | 5.07 | 16.96 | 7.61  | 2.06 | 1.15     | 1.24 |
| PUD  | 1.94  | 3.39 | 12.68 | 4.57  | 2.78 | 1.50     | 1.36 |
| PUDD | 2.06  | 2.06 | 9.77  | 3.53  | 2.13 | 1.53     | 1.41 |
| PUDD | 2.16  | 3.74 | 10.19 | 6.69  | 1.57 | 0.84     | 1.20 |
| PUDD | 0.12  | 3.32 | 27.75 | 3.74  | 1.56 | 1.55     | 0.91 |
| PUDD | 1.31  | 2.39 | 15.04 | 3.91  | 1.24 | 1.27     | 1.01 |
| PUDD | 1.21  | 2.61 | 31.67 | 8.28  | 1.36 | 0.70     | 0.52 |
| PUDE | 4.49  | 3.73 | 8.14  | 3.53  | 3.56 | 0.77     | 1.62 |
| PUDE | 3.85  | 4.16 | 9.36  | 6.47  | 3.28 | 1.20     | 1.88 |
| PUDE | 5.20  | 2.99 | 3.91  | 3.18  | 2.13 | 0.81     | 1.52 |
| PUDE | 4.72  | 2.73 | 5.76  | 3.99  | 3.54 | 0.69     | 1.92 |
| PUDE | 1.97  | 3.49 | 10.94 | 2.97  | 1.84 | 1.14     | 1.37 |
| PUDE | 3.15  | 3.94 | 8.32  | 5.58  | 1.68 | 0.60     | 1.27 |

PUD: control; PUDE: control+Ex4; PUDD: DM; PUDDE: DM+Ex4
