# Supplementary material for: Exendin-4, a glucagon-like peptide-1 analogue accelerates healing of chronic gastric ulcer in diabetic rats
Source: PubMed Central journal article supplement (PMC5667749; doi:10.1371/journal.pone.0187434), 2017-11-02
Supplement: pone.0187434.s004.pdf [file pone.0187434.s004.pdf]

### Tissue cAMP (pmol/mg protein)

| Sham   | PUD    | PUDE   | PUDD   | PUDDE  |
|--------|--------|--------|--------|--------|
| 13.352 | 9.034  | 8.01   | 10.473 | 11.966 |
| 9.486  | 7.394  | 7.146  | 10.682 | 10.552 |
| 9.334  | 6.412  | 5.358  | 9.1108 | 10     |
| 10.184 | 8.618  | 7.326  | 8.9238 | 9.378  |
| 17.44  | 13.414 | 6.742  | 9.823  | 10.306 |
|        | 8.14   | 11.214 | 14.479 | 10.812 |
|        | 8.79   | 8.626  | 17.732 | 13.56  |
|        | 9.694  | 5.436  | 9.2549 | 5.546  |
|        | 9.45   | 3.434  | 13.069 | 8.388  |
|        | 15.972 | 9.868  |        | 6.186  |
|        | 11.196 | 8.002  |        |        |
|        | 7.01   | 9.868  |        |        |
|        | 6.458  | 8.002  |        |        |

PUD: control; PUDE: control+Ex4; PUDD: DM; PUDDE: DM+Ex4

### Myeloperoxidase activity (U/g protein)

| Sham  | PUD    | PUDE   | PUDD   | PUDDE  |
|-------|--------|--------|--------|--------|
| 1.402 | 2.6214 | 2.3632 | 3.0252 | 2.0984 |
| 1.688 | 2.8846 | 2.1514 | 3.2452 | 2.13   |
| 1.642 | 2.8954 | 1.2919 | 3.0149 | 2.3798 |
|       | 1.8243 | 0.9122 | 3.24   | 2.4272 |
|       | 1.4385 | 0.8282 | 2.5478 | 2.3427 |
|       |        | 1.8443 | 3.2143 | 2.0287 |
|       |        | 2.3547 |        |        |

PUD: control; PUDE: control+Ex4; PUDD: DM; PUDDE: DM+Ex4

### Tissue superoxide anions ( $\mu\text{mol}/\text{min}/\text{g}$ protein)

| Sham | PUD | PUDE | PUDD | PUDDE |
|------|-----|------|------|-------|
| 85   | 196 | 154  | 290  | 270   |
| 112  | 235 | 221  | 297  | 170   |
| 93   | 242 | 170  | 217  | 165   |
| 137  | 280 | 160  | 311  | 193   |
|      |     | 211  | 201  | 200   |
|      |     | 264  | 392  | 212   |
|      |     | 254  | 343  | 169   |
|      |     |      | 282  |       |

PUD: control; PUDE: control+Ex4; PUDD: DM; PUDDE: DM+Ex4
