# Supplementary material for: Exendin-4, a glucagon-like peptide-1 analogue accelerates healing of chronic gastric ulcer in diabetic rats
Source: PubMed Central journal article supplement (PMC5667749; doi:10.1371/journal.pone.0187434), 2017-11-02
Supplement: pone.0187434.s005.pdf [file pone.0187434.s005.pdf]

## Gastric juice pH

| PUD | PUDE | PUDD | PUDDE |   |
|-----|------|------|-------|---|
|     | 6    | 3    | 4     | 3 |
|     | 2    | 3    | 3     | 3 |
|     | 2    | 4    | 3     | 3 |
|     | 3    | 4    | 3     | 3 |
|     | 3    | 3    | 2     | 3 |
|     | 4    | 3    | 2     | 3 |
|     | 3    | 3    | 2     | 2 |
|     | 3    | 3    | 5     | 2 |
|     |      | 3    | 3     | 4 |
|     |      | 3    | 3     | 3 |
|     |      | 4    |       |   |

PUD: control; PUDE: control+Ex4; PUDD: DM; PUDDE: DM+Ex4

### Body weight gained (gm)

| PUD | PUDE | PUDD | PUDDE |
|-----|------|------|-------|
| 30  | 0    | -25  | -25   |
| 35  | 10   | -10  | -15   |
| 10  | 5    | -30  | -30   |
| 25  | 5    | -5   | -30   |
| -10 | 10   | -10  | -20   |
| -20 | 35   | -25  | -20   |
| 15  | 10   | -20  | -10   |
| 5   | 5    | -20  | -40   |
| 10  | 20   | -20  | -50   |
| -40 |      | -15  | -35   |
| -35 |      |      |       |
| 0   |      |      |       |

PUD: control; PUDE: control+Ex4; PUDD: DM; PUDDE: DM+Ex4

**Blood glucose (mg/dl)**

| <b>Sham</b> | <b>PUD</b> | <b>PUDE</b> | <b>PUDD</b> | <b>PUDDE</b> |
|-------------|------------|-------------|-------------|--------------|
| 144         | 178        | 108         | 198         | 469          |
| 148         | 145        | 126         | 194         | 222          |
| 148         | 143        | 118         | 427         | 381          |
| 225         | 156        | 112         | 363         | 445          |
|             | 178        | 136         | 510         | 489          |
|             | 173        | 147         | 431         | 216          |
|             | 149        | 116         | 184         | 348          |
|             | 106        | 119         |             | 478          |
|             |            | 102         |             |              |
|             |            | 123         |             |              |
|             |            | 130         |             |              |

PUD: control; PUDE: control+Ex4; PUDD: DM; PUDDE: DM+Ex4

Serum IL-1B

| Sham  | PUD   | PUDD   | PUDDE  |
|-------|-------|--------|--------|
| 903.6 | 828.7 | 696.8  | 379.9  |
| 865.3 | 759.9 | 903.6  | 471.8  |
| 611.9 | 561.1 | 1224.0 | 305.9  |
| 727.7 | 514.5 | 1029.0 | 1159.0 |
|       | 667.3 | 2149.0 | 696.8  |
|       | 471.8 | 561.1  | 379.9  |
|       | 828.7 |        | 561.1  |
|       |       |        | 1147.0 |
|       |       |        | 134.3  |

PUD: control; PUDE: control+Ex4; PUDD: DM; PUDDE: DM+Ex4

| Sham  | PUD   | PUDD  | PUDDE |
|-------|-------|-------|-------|
| 119.8 | 119.8 | 119.8 | 97.6  |
| 152.0 | 304.0 | 119.8 | 119.8 |
| 152.0 | 119.8 | 152.0 | 119.8 |
| 152.0 | 119.8 | 304.0 | 119.8 |
